# Supplementary material
Source: Springer Nature journal article supplement (https://www.springermedizin.de/resource/supplementary/12885_2014_5176_MOESM8_ESM.pdf/9468398)

**A** HCC1806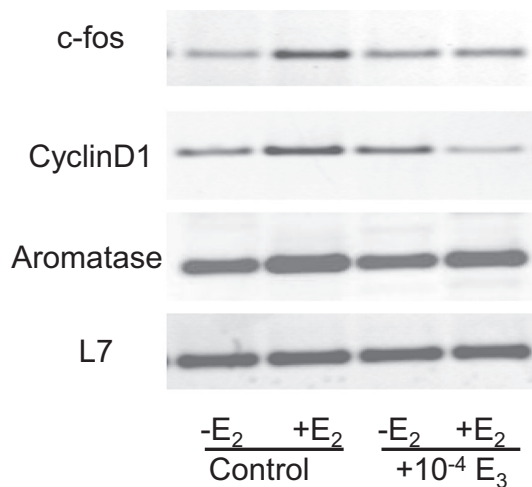**HCC1806**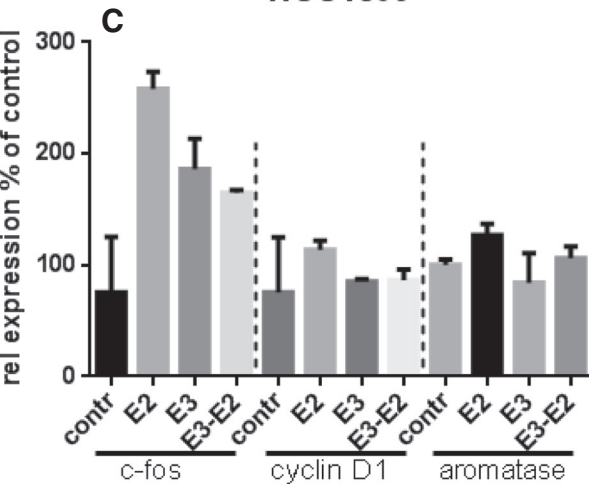**B** HCC70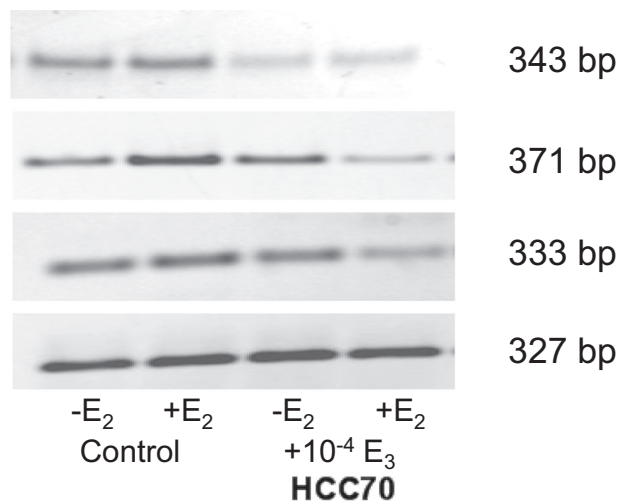**HCC70**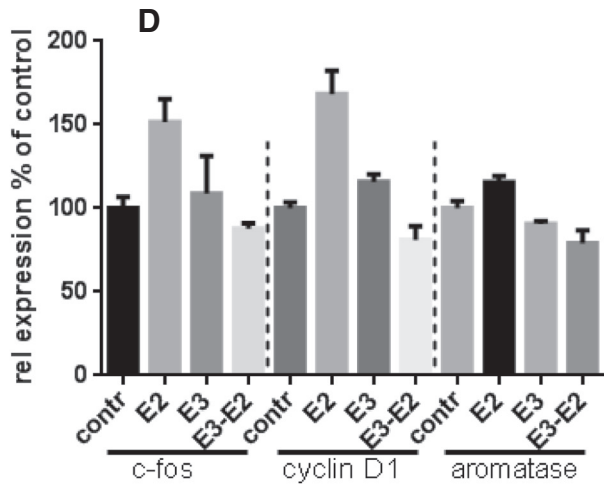

Supplement: MOESM8 [file 9468398]
